1 **Full title: Uptake of Intrauterine Contraception after Medical Management of First**  
2 **Trimester Incomplete Abortion: A Cross-sectional study in central Uganda**

3

4 **Short title: Uptake of Post Abortion Intrauterine Contraception in Uganda**

5

6 **Herbert Kayiga<sup>1\*</sup>, Emelie Looft-Trägårdh<sup>2</sup>, Amanda Cleve<sup>2,3</sup>, Othman Kakaire<sup>1</sup>,**  
7 **Nazarius Mbona Tumwesigye<sup>4</sup>, Musa Sekikubo<sup>1</sup>, Joseph Rujumba<sup>5</sup>, Kristina Gemzell-**  
8 **Danielsson<sup>2</sup>, Josaphat Byamugisha<sup>1</sup>**

9

10 <sup>1</sup>Department of Obstetrics and Gynecology,  
11 Makerere University, College of Health Sciences, Kampala, Uganda

12

13 <sup>2</sup>Department of Women's and Children's Health,  
14 Karolinska Institutet, and WHO collaborating centre, Karolinska University  
15 Hospital, Stockholm, Sweden

16

17 <sup>3</sup>Department of Global Public Health,  
18 Karolinska Institutet, Sweden

19

20 <sup>4</sup>Makerere University, School of Public Health,  
21 Makerere University, College of Health Sciences, Kampala, Uganda

22

23 <sup>5</sup>Department of Paediatrics and Child Health,  
24 Makerere University, College of Health Sciences, Kampala, Uganda

25

26 \*Corresponding Author

27 Email: [hkayiga@gmail.com](mailto:hkayiga@gmail.com) (HK)

## 28 **Abstract:**

29 **Background:** Although intrauterine devices (IUDs) are readily available in Uganda, their  
30 utilization remains low, including within post abortion care. The level and factors associated  
31 with uptake of post abortion IUDs are not well documented. We set out to determine the uptake

**NOTE: This preprint reports new research that has not been certified by peer review and should not be used to guide clinical practice.**

32 and factors associated with uptake of post abortion IUDs after medical management of first  
33 trimester incomplete abortions in central Uganda.

34 **Methods:** Between February 2023 and September 2023, we conducted a cross-sectional  
35 study among women aged 15 to 49 years, who expressed interest in initiating post abortion  
36 intrauterine contraception and were managed with Misoprostol for first trimester incomplete  
37 abortions at five health facilities in central Uganda. Healthcare providers received extensive  
38 training in post abortion contraceptive counselling and service provision. Data from 650  
39 participants were collected using interviewer administered questionnaires. The primary  
40 outcome was uptake of post abortion IUDs, defined as the actual insertion of the post abortion  
41 IUDs. Data were collected during a post abortion follow up visit. The determinants of post  
42 abortion IUD uptake were assessed using the modified poisson regression.

43 **Results:** The proportion of women who took up IUDs after medical management of first  
44 trimester abortion, was 370/650 (56.9%). Among the other available contraceptive choices,  
45 121(18.6%) women opted for injectable Depo-Provera (DMPA), 116(17.9%) women opted for  
46 implants, 35(5.4%) women opted for oral contraceptive pills, five (0.8%) of the women opted  
47 for condoms, and three (0.5%) women for periodic abstinence. The mean age of the participants  
48 was (27.3  $\pm$  SD 1.8) years. A high proportion of the women in the study were; Catholics  
49 (32.3%), unemployed (52.6%), cohabiting with their partners (84.0%) and had given birth to  
50 2-3 children (38.5%). A high proportion (56%) of IUD users, opted for the copper IUDs. The  
51 post abortion IUD uptake was independently associated with religion- being a Pentecostal  
52 (Adjusted PR=2.49, CI= (1.19-5.23), p-value=0.016), monthly earning > one million Ugx (270  
53 USD) (Adjusted PR=1.88, CI= (1.44-2.46), p-value<0.001), and staying <5 kilometres from  
54 the health facility (Adjusted PR=1.34, CI= (1.04-1.72), p-value=0.023). Women who were not  
55 cohabiting with their partners, were less likely to choose IUDs (Adjusted PR=0.59, CI= (0.44-  
56 0.79), p-value=0.001).

57 **Conclusion:** The uptake of IUDs among post abortion women was nearly 60%  
58 emphasizing the potential impacts of integrated contraceptive services in Post abortion care.  
59 The impact of comprehensive and updated training on post abortion contraceptive counselling  
60 is vital on the uptake of IUDs. Regardless of sociodemographic status, women seeking post  
61 abortion care in Uganda should be provided with high-quality integrated services by trained  
62 providers offering a range of contraceptive methods. Such efforts may not only prevent  
63 unintended pregnancies but also improve health equity across the country.

64 **Key words:** Uptake, Intrauterine contraception, First-trimester, Incomplete abortions,  
65 Misoprostol, and central Uganda.

## 67 **Introduction:**

68 Unwanted pregnancies lead to induced abortions [1] that may result into unsafe abortions and  
69 subsequent abortion-related complications [2] such as sepsis, hemorrhage, infertility and  
70 adverse pregnancy outcomes in the subsequent pregnancies [3, 4]. Unsafe abortions [5] in sub-  
71 Saharan Africa, have been implicated in 9.9% of the maternal deaths [6]. On the African  
72 continent, 460 deaths per 100,000 as compared to 30 deaths per 100,000 in high income  
73 countries follow unsafe abortions [7]. A high unmet need for effective contraception in Africa,  
74 has been identified as the main driver for the unwanted pregnancies [8].

75  
76 Uganda has a high total fertility rate of 5.2 births per women [9], and a largely young population  
77 where nearly 80% of the population is below 30 years. Nearly 50% of the total population are  
78 adolescent girls. The unmet need for modern contraception in Uganda of 27.7%, [10] is higher  
79 than the proportion reported for the East African region (24.6%) [11]. As a result, 56% (1.2  
80 million) of all pregnancies in this region are unintended, with 25% of the pregnancies (39 per  
81 1000) ending in abortion [12-14]. With the abortion laws being restrictive, many Ugandan  
82 women experience induced abortions, some of whom end up as unsafe abortions or as maternal  
83 deaths [15, 16].

84  
85 First trimester incomplete abortions are managed either surgically using manual vacuum  
86 aspiration or medically using Misoprostol [17, 18]. Research shows that Misoprostol is highly  
87 acceptable, effective and safe to use in the management of first trimester incomplete  
88 abortion [17]. After surgical management, most of the contraceptive methods including IUDs  
89 can be initiated immediately thereafter [19]. Women do not need to return after the intervention  
90 as commonly seen after medical management of incomplete abortions [20-26]. In many  
91 settings, a high proportion of women never return for in-person follow up visits [20-26]. With  
92 fertility returning as early as two weeks of the uterine evacuation [27], there is a need for  
93 women to have access to effective contraception to prevent future unwanted and mistimed  
94 pregnancies [28].

95  
96 Although, intrauterine devices (IUDs) are readily available in Uganda, their user rate has stalled  
97 at two percent among the currently married and 15% among the sexually active unmarried  
98 women [9]. In other parts of Africa, similar trends have been reported [29, 30] with IUD user  
99 rates of less than five percent. Prior studies in sub-Saharan Africa have associated low user

100 rates with low educational status [10, 31], desire for more children [32], myths and  
101 misconceptions [33], unsupportive spouses [34], low socio-economic status [35], religion [10,  
102 34, 36], poor prior pregnancy outcomes [36], inadequate skills among healthcare providers [37]  
103 and knowledge gaps about IUDs [28].

104

105 Information on rates of IUD uptake within post abortion care, and the factors that are associated  
106 with uptake, are lacking in Uganda. Such information may be useful in order to improve post  
107 abortion IUD uptake and prevent unintended pregnancies in Uganda. To this end, this study set  
108 out to determine the level and factors associated with uptake of post abortion intrauterine  
109 contraception following medical management of first trimester incomplete abortions in central  
110 Uganda.

## 111 **Materials and Methods:**

### 112 **Study design:**

113 We used a cross-sectional study to determine the level and factors associated with uptake of  
114 post abortion IUDs following medical management of first trimester incomplete abortions at  
115 five public facilities between 1<sup>st</sup> February 2023 and 30<sup>th</sup> September 2023.

### 116 **Study setting:**

117 Five public health facilities including Kawempe National Referral Hospital, Kayunga Regional  
118 Referral Hospital, Mityana General Hospital, Kiganda Health centre IV, and Bukuya Health  
119 centre III were selected from central Uganda. The central region was selected due to the high  
120 abortion rate compared to the national average (62 vs. 39 per 1,000 live births) and the large  
121 case load of women treated for abortion complications in this setting [12, 16, 38]. All five  
122 health facilities offered free medical and contraception services seven-days a week (24/7) and  
123 were at the time of the study, the biggest family planning service providers in central Uganda.  
124 These facilities were run by healthcare providers of different cadres, with a senior midwife  
125 overseeing the family planning administrative duties. The selected facilities had sufficient staff  
126 to establish a group of 250 midwives and 80 physicians and a caseload of 50-150 post abortion  
127 care patients a month. The infrastructures for family planning research were already in  
128 existence at these sites. Healthcare providers received extensive training in post abortion  
129 contraceptive counselling and service provision.

130 All study sites were located within 1-2 hours from Kampala, the capital city of Uganda. The  
 131 selected public study sites were equipped to provide comprehensive emergency gynaecological  
 132 services in rural, peri-urban and urban areas. Routinely at the health facilities, women  
 133 presenting with symptoms and signs of incomplete abortion are triaged at the emergency wards  
 134 or the outpatient department. History taking and physical examination are conducted by the  
 135 attending healthcare providers including an abdominal-pelvic assessment to ascertain the  
 136 presence of cervical dilation. Pregnancy dating is done by calculating the weeks of gestation  
 137 from the first day of the last menstrual period or by ultrasound. Laboratory examinations are  
 138 usually undertaken if the patient is found to be anemic or has other co-morbidities like febrile  
 139 illnesses. Other investigations are performed based on the symptoms and clinical examination  
 140 findings. Patients with first trimester incomplete abortion based on their clinical status, are  
 141 managed either medically using Misoprostol or surgically using manual vacuum aspiration.  
 142 The management of the incomplete abortions is usually on an out-patient basis unless patients  
 143 present with complications necessitating blood transfusion in severe anemia, exploratory  
 144 laparotomy with perforated uteri or administration of parenteral antibiotics as seen in septic  
 145 abortions. (See Appendix 1) for the descriptive characteristics of the five study sites.

146 **Appendix 1: Descriptive characteristics of five selected health facilities in central Uganda**

| Health Unit                        | Location | Bed capacity | No. of healthcare providers | Duration of work               | Cumulative 1 <sup>st</sup> trimester Abortion load in the past 3 months | Setting    | Service delivered                                                               |
|------------------------------------|----------|--------------|-----------------------------|--------------------------------|-------------------------------------------------------------------------|------------|---------------------------------------------------------------------------------|
| Kawempe National Referral Hospital | Kampala  | 900          | 500                         | 24 hours a day, 7 days a week. | 484                                                                     | Urban      | Teaching hospital. Offers free emergency gynaecological and obstetric services. |
| Mityana General Hospital           | Mityana  | 100          | 116                         | 24 hours a day, 7 days a week. | 100                                                                     | Peri-urban | Offers comprehensive maternal health services including PAC.                    |

|                                    |          |     |     |                               |     |            |                                                                   |
|------------------------------------|----------|-----|-----|-------------------------------|-----|------------|-------------------------------------------------------------------|
| Kiganda Health Centre IV           | Kassanda | 15  | 50  | 24 hours a day, 7 days a week | 38  | Rural      | Offers both in and outpatient services including family planning. |
| Kayunga Regional Referral Hospital | Kayunga  | 200 | 179 | 24 hours a day, 7 days a week | 212 | Peri-urban | Offers specialist maternal services including PAC.                |
| Bukuya Health centre III           | Kassanda | 20  | 30  | 24 hours a day, 7 days a week | 60  | Rural      | Offers maternal services including PAC, family planning services. |

147 **Participant recruitment:**

148 The criteria for identifying study participants with incomplete abortion was based on  
149 experience of any of the following conditions: a confirmation of pregnancy by any of the  
150 following methods; a positive urine HCG, ascertaining the gestation age on ultrasound scan or  
151 calculation from the first day of the last menstrual period. Furthermore, history of lower  
152 abdominal pain, or cramps, and vaginal bleeding, before 12 weeks of gestation was needed to  
153 confirm occurrence of first trimester incomplete abortion. Clinical evaluation that included  
154 ascertaining the symphysio-fundal height, cervical dilatation, feeling or visualization of  
155 products of conception on vaginal or speculum examination by the clinical team, was  
156 conducted to confirm the diagnosis of first trimester incomplete abortion. The research  
157 assistants being part of the care teams at the different health facilities, identified and  
158 approached potential participants willing to undertake medical management for first trimester  
159 incomplete abortion from the emergency gynaecology units. Individuals interested in using  
160 post abortion intrauterine contraception were given all the required information on all available  
161 contraceptive methods to enable them make an informed voluntary choice of a family planning  
162 method. They were then assessed for eligibility, provided written and oral information about  
163 the study. Participants who consented to participate, were enrolled into the study. An  
164 interviewer administered, semi-structured questionnaire was used to collect data at the  
165 participants' convenience at the five public facilities before discharge from the facility.

166 **Inclusion criteria:**

167 Women 15 years or older having undergone medical management for first trimester incomplete  
168 abortion and expressed interest in initiating post abortion intrauterine contraceptive method,  
169 within the past four weeks and who were willing to participate in the study, were recruited.

170 **Exclusion criteria:**

171 Participants who were too sick to participate in the study or with confirmed uterine anomalies  
172 like bicornuate uterus, coagulopathies, severe anemia, allergy to copper or Levonorgestrel  
173 IUDs, or sepsis, were excluded.

174 **Data collection procedure:**

175 All eligible women with first trimester incomplete abortion who opted for medical management  
176 of abortion, meeting the inclusion criteria for post abortion intrauterine contraception, were  
177 invited to participate in the study. At the post abortion follow-up visit within four weeks  
178 following medical management of abortion, potential participants were given comprehensive  
179 contraceptive counselling and information about the study. Participants who were interested  
180 were enrolled consecutively into the study and given their preferred contraceptive choices. A  
181 pretested standard questionnaire was administered by the trained staff on participants'  
182 sociodemographic characteristics, contraceptive choices and predictors of the post abortion  
183 intrauterine contraceptive uptake.

184 **Sample size calculation:**

185 We used a study that assessed *Post abortion contraceptive uptake among young women in ten*  
186 *countries in South Asia and Africa*, to calculate the sample size for the primary outcome. In  
187 this study, the overall uptake of IUDs was 11%[39]. After computation into OpenEpi info  
188 sample size calculator, we required 190 participants to answer the objective on uptake of the  
189 post abortion IUDs.

190 **Sample size calculation for factors associated with Post Abortion Intrauterine**

191 **Contraception after first Trimester Medical PAC (secondary outcomes):**

192 In a study by Makenzius[5], the Age group of 21–25 (OR: 2.35;  $p < 0.029$ ) was independently  
193 associated with contraceptive uptake in PAC. Using OpenEpi info sample size calculator, with  
194 OR of 2.35, power of 80%, two-sided confidence level of 95% and level of significance of  
195  $< 0.05$ , a sample size for associated factors of 642 participants was required. To compensate for  
196 any non-response, a total sample of 650 participants was used to determine both primary and



197 secondary objectives for the study. The primary outcome and secondary outcomes (choice of  
198 other contraceptive methods) were measured during the post abortion follow-up visit.

199 **Primary outcome:** Uptake of post abortion intrauterine contraception, was defined as the  
200 actual placement of the post abortion IUDs within four weeks of medical management of first  
201 trimester incomplete abortion.

202 **Predictor variables:** Sociodemographic characteristics like Age, parity, socio-economic  
203 status, education background, health facility factors like availability of the contraceptive mix,  
204 were assessed in relation to the uptake of the post abortion IUDs.

## 205 **Quality Control:**

### 206 **Staff training and recruitment:**

207 Nurse-midwives familiar with the local hospital settings were selected and trained for three  
208 days. The training included how to identify potential participants, study procedures and  
209 participant recruitment while observing the research ethics in accordance to the Declaration of  
210 Helsinki[40]. Thirty research assistants were then selected to collect the data at five study sites  
211 over the study period. The nurse-midwives were also trained on how to identify emergencies  
212 like severe hemorrhage following the abortion, need for blood transfusion, genital infections  
213 like septic abortion and the procedures to undertake so as to inform the obstetric team on duty  
214 so that the affected participants could obtain timely emergency care to save their lives.

215

216 A pilot study was carried out to pretest and modify the data collection tools. Completed data  
217 collection tools were checked daily for completeness and thereafter edited, coded and entered  
218 by two data clerks on same day of collection for the five health facilities into KoboToolbox, an  
219 online platform for data collection. Data was backed up on external hard drives, encrypted and  
220 kept on a secure cloud storage. The database used was password protected and the participants'  
221 records were kept under restricted access in a lockable cabin. The research materials were only  
222 accessed by the research team in order to protect patient confidentiality and privacy.

### 223 **Data management:**

224 Electronic questionnaires were designed in KoboToolbox (<https://www.kobotoolbox.org/>)  
225 with programmed logic checks and validation rules. The KoboToolbox software was installed  
226 on two tablets for the two data clerks to ensure double data entry. Preset validation checks in  
227 KoboToolbox enabled us to ensure that the questionnaires were fully and correctly filled before  
228 the data was sunk into the local database. We performed double data entry to ensure consistency

229 between the two entered data. Data was then downloaded into the PAIC database and cleaned  
230 using STATA version 15.0. Queries were generated and addressed by the principal investigator  
231 and research team before final data freeze and analysis.

### 232 **Ethical consideration:**

233 Ethical approvals were obtained from The Makerere University School of Medicine Research  
234 and Ethics Committee, (Mak-SOMREC-2021-131), and Uganda National Council for Science  
235 and Technology (HS2111ES). Administrative clearances were obtained from the  
236 administrators of the five health facilities. Written informed consent was obtained from all  
237 study participants prior to data collection. Participants were reassured that participating in the  
238 study was voluntary and that they could opt out of the study without any interference with the  
239 relationship with the research team and service delivery. Participants were compensated for  
240 their time. Confidentiality and participants' rights were observed throughout the study.

### 241 **Analysis:**

242 Univariate analysis was done using frequencies and percentages for categorical variables and  
243 mean and standard deviation for continuous variables. We then compared the background  
244 characteristics of the participants who had insertion of the post abortion IUDs to those who  
245 opted for other contraceptive methods. Categorical variables were analysed using a Chi-square  
246 while continuous variables were analysed using student's t test for normally distributed data  
247 and fisher's exact t test for skewed data.

248

249 Bivariate analysis was done using modified poisson regression due to the prevalence being  
250 greater than 15%. Crude Prevalent Ratios were obtained and variables with a p-value of less  
251 than 0.2 were included into the final multivariate model. To determine factors independently  
252 associated with uptake of intrauterine contraception, adjusted Prevalent Ratio were obtained  
253 using the modified poisson regression model. Variables with p-values of less than 0.05 were  
254 considered statistically significant. The level of uptake of the IUDs was determined by the  
255 computing the proportion of women who had post abortion IUDs inserted as their contraceptive  
256 method out of the women who receive family planning counselling following medical  
257 management for first trimester incomplete abortion, expressed as a percentage.

258

259 We assessed for confounding by considering a ten percent change in the Prevalence Ratio of a  
260 model with the dependent variable and one without. Interaction between the study variables

261 was assessed by forming two-way interaction terms and comparing the models using the  
262 likelihood ratio test. Using the Modified Hosmer-Lemeshow test as the ideal test for goodness  
263 of model fit for the modified poisson regression, we obtained 0.57 which is greater than 0.05.  
264 This shows that the model's predicted probabilities were well-aligned with the observed  
265 outcomes, indicating good model calibration.

## 266 **Results:**

### 267 **Baseline characteristics of study participants:**

268  
269 Between 1<sup>st</sup> February 2023 and 30<sup>th</sup> September 2023, we screened 1,911 potential participants  
270 who received medical management of first trimester incomplete abortions and were willing to  
271 take up post abortion intrauterine contraception at the five health facilities. Out of these  
272 potential participants, we enrolled 650 participants. The proportion of women who took up  
273 IUDs after medical management of first trimester abortion, was 370/650 (56.9%). The majority  
274 of participants who opted for intrauterine contraception chose the copper IUDs 213(57.6%)  
275 while 157(42.4%) opted for Levonorgestrel IUDs. Of the other available contraceptive  
276 methods, 121(18.6%) women opted for injectable Depo-Provera (DMPA), 116(17.9%) women  
277 for implants, 35(5.4%) women opted for oral contraceptive pills, five (0.8%) of the women  
278 opted for condoms, and three (0.5%) women opted for periodic abstinence.

279  
280 A high proportion of the participants (56.6 %) were aged between (25-29) years, were Catholics  
281 (32.3%), and housewives or unemployed (52.6%). The mean age was (27.3 ± SD 1.8) years.  
282 Over 50% of the participants who had abortions, had had a livebirth before. The majority of  
283 the women who had had abortions were living with a partner (84.0%) and had 2-3 children  
284 (38.5%). Only one percent of the participants had a monthly income greater than Ugx shillings  
285 1,000,000/= (USD 270). (Table 1)

286 **Table 1: Sociodemographic characteristics of 650 participants:**

| <b>Variables</b>     | <b>Freq(n) (%)</b> |
|----------------------|--------------------|
| <b>Age-group</b>     |                    |
| Below 20 years       | 61(9.38)           |
| 20-24                | 166(25.54)         |
| 25-29                | 202(31.08)         |
| 30-35                | 156(24.00)         |
| Greater than 35years | 65(10.00)          |
| <b>Religion</b>      |                    |
| Adventist            | 18(2.77)           |
| Anglican/Protestant  | 170(26.15)         |

|                                                                  |            |
|------------------------------------------------------------------|------------|
| Catholic                                                         | 210(32.31) |
| Moslem                                                           | 113(17.38) |
| Pentecostal                                                      | 139(21.38) |
| <b>Prior pregnancy outcome</b>                                   |            |
| Early Neonatal Death (ENND)                                      | 7(1.08)    |
| Intrauterine fetal death (IUFD)                                  | 9(1.38)    |
| Induced abortion                                                 | 42(6.46)   |
| Live birth                                                       | 387(59.94) |
| No prior pregnancy                                               | 95(14.62)  |
| Spontaneous abortion                                             | 110(16.92) |
| <b>Number of living children</b>                                 |            |
| 0                                                                | 103(15.85) |
| 1                                                                | 137(21.08) |
| 2-3                                                              | 250(38.46) |
| 4-5                                                              | 115(17.69) |
| >5                                                               | 33(5.08)   |
| No response                                                      | 12(1.85)   |
| Mean (SD)                                                        | 2.81(1.16) |
| <b>Level of education</b>                                        |            |
| No formal education                                              | 17(2.62)   |
| Primary                                                          | 197(30.31) |
| O level education                                                | 311(47.85) |
| A level education                                                | 61(9.38)   |
| Tertiary                                                         | 64(9.85)   |
| <b>Occupation</b>                                                |            |
| Employed                                                         | 310(47.69) |
| Housewife or unemployed                                          | 340(52.61) |
| <b>Monthly income (Ugx Shillings)</b><br><b>(1 USD/3700 Ugx)</b> |            |
| <50,000/=                                                        | 307(47.23) |
| 50,000-499,999/=                                                 | 278(42.88) |
| 500,000-999,999/=                                                | 48(7.38)   |
| >1,000,000/=                                                     | 7(1.08)    |
| No response                                                      | 10(1.54)   |
| <b>Distance from Health facility</b>                             |            |
| <5km                                                             | 270(45.54) |
| 5-10 km                                                          | 167(25.69) |
| 11-15km                                                          | 82(12.69)  |
| 16-20km                                                          | 55(8.46)   |
| >20km                                                            | 76(11.69)  |
| Mean (SD)                                                        | 3.31(1.17) |
| <b>Smoking status</b>                                            |            |
| No                                                               | 631(97.08) |
| Yes                                                              | 19(2.92)   |
| <b>Relationship Status</b>                                       |            |
| Living with a partner                                            | 546(84.00) |
| Not living with a partner                                        | 104(16.00) |
| <b>Number of sexual partners</b>                                 |            |
| 1                                                                | 520(80.00) |
| 2-3                                                              | 130(20.00) |

**Accompanied by Partner to the clinic**

No 469(72.15)  
 Yes 181(27.85)

**HIV Status**

Negative 621(95.54)  
 Positive 29(4.46)

**Current uptake of Post abortion contraceptive method(N=650)**

Condoms 5(0.77)  
 Copper IUDs 213(32.77)  
 Levonorgestrel IUD 157(24.15)  
 Injectable 121(18.62)  
 Implants 116(17.85)  
 Periodic abstinence 3(0.46)  
 Pills 35(5.38)

**Partner’s approval of post-abortion contraception**

No 301(46.67)  
 Yes 344(53.33)

287 *N stands for absolute frequency and % stands for Row percentage*

288

289 **Factors associated with the use of IUDs after the first trimester of incomplete**  
 290 **abortion in Uganda.**

291

292 At bivariate analysis; age, religion, current number of children, occupation, monthly income,  
 293 distance from health facility, spousal approval of the contraception, and co-habiting status,  
 294 were statistically associated with the use post abortion IUDs after the first trimester of  
 295 incomplete abortion with a p-value less than 0.2.(Table 2)

296

297 At multivariate analysis; Women who were Pentecostal or Catholic, earning more than one  
 298 million Ug shillings (USD 270), staying within five kilometres from the health facilities and  
 299 living with their partners were more likely to choose post abortion IUDs.

300 Religion: Pentecostal women were 2.49 (Adjusted PR=2.49, CI= (1.19-5.23) p-value=0.016)  
 301 times more likely to use IUDs compared to those who were Adventists. Women who were  
 302 Catholics were 2.15 (Adjusted PR=2.13, CI= (1.01-4.47), p-value=0.045) times more likely to  
 303 use IUDs compared to those who were Adventists.

304 Socioeconomic status: Women who earned greater than 1,000,000/= (USD 270) were 88%  
 305 (Adjusted PR=1.88, CI= (1.44-2.46), p-value<0.001) more likely to use IUDs compared to  
 306 those who earned less than 50,000/=.

307 Cohabiting Status: Women who were not living with their partners were 41% (Adjusted  
308 PR=0.59, CI= (0.44-0.79), p-value=0.001) less likely to use IUDs compared to those who were  
309 living with their partners.

310 Proximity to the health facilities: Women who lived less than five kilometres from the health  
311 facility were 34% (Adjusted PR=1.34, CI= (1.04-1.72), p-value=0.023) more likely to use  
312 IUDs compared to those who lived more than 20 kilometres from the health facility. (See Table  
313 2)

314 **Table 2: Regression analysis of the factors associated with the Uptake of IUDs after**  
315 **First Trimester Incomplete Abortion managed with Misoprostol (n= 650).**

| Variables                              | Use of IUDs<br>No(n=280) | Unadjusted PR (CI 95%)<br>Yes(n=370) | Adjusted PR (CI 95%) |
|----------------------------------------|--------------------------|--------------------------------------|----------------------|
| <b>Age-group</b>                       |                          |                                      |                      |
| Less than 20 years                     | 31(11.07)                | 30(8.11)                             | 1                    |
| 20-24                                  | 84(30.00)                | 82(22.16)                            | 1.00(0.74-1.35)      |
| 25-29                                  | 80(28.57)                | 122(32.97)                           | 1.23(0.93-1.62)      |
| 30-35                                  | 60(22.14)                | 94(25.14)                            | 1.22(0.92-1.63)      |
| Greater than 35                        | 23(8.21)                 | 42(11.35)                            | 1.31(0.96-1.80)      |
| <b>Religion</b>                        |                          |                                      |                      |
| Adventist                              | 13(4.66)                 | 5(1.36)                              | 1                    |
| Anglican/Protestant                    | 76(27.24)                | 94(25.61)                            | 1.99(0.93-4.25)      |
| Catholic                               | 90(32.26)                | 120(32.70)                           | 2.06(0.97-4.38)      |
| Moslem                                 | 53(19.00)                | 60(16.35)                            | 1.91(0.89-4.11)      |
| Pentecostal                            | 47(16.85)                | 88(23.98)                            | 2.35(1.10-5.00)      |
| <b>Current number of children</b>      |                          |                                      |                      |
| 0                                      | 58(20.71)                | 45(12.16)                            | 1                    |
| 1                                      | 68(24.29)                | 69(18.65)                            | 1.15(0.88-1.52)      |
| 2-3                                    | 97(34.64)                | 153(41.35)                           | 1.40(1.10-1.78)      |
| 4-5                                    | 39(13.93)                | 76(20.54)                            | 1.51(1.17-1.95)      |
| >5                                     | 12(4.29)                 | 21(5.68)                             | 1.46(1.04-2.04)      |
| No response                            | 6(2.14)                  | 6(1.62)                              | 1.14(0.62-2.10)      |
| <b>Occupation</b>                      |                          |                                      |                      |
| Employed                               | 125(44.64)               | 185(50.00)                           | 1                    |
| Housewife or unemployed                | 155(55.36)               | 185(50.00)                           | 0.91(0.80-1.04)      |
| <b>Monthly income (1 USD/3700 Ugx)</b> |                          |                                      |                      |
| <50,000/=                              | 143(51.07)               | 164(44.32)                           | 1                    |
| 50,000-499,999/=                       | 111(39.64)               | 167(45.14)                           | 1.12(0.98-1.30)      |
| 500,000-999,999/=                      | 17(6.07)                 | 31(6.38)                             | 1.21(0.96-1.53)      |
| >1,000,000/=                           | 1(0.36)                  | 6(1.62)                              | 1.60(1.16-2.21)      |
| No response                            | 8(2.86)                  | 2(0.54)                              | 0.37(0.11-1.30)      |
| <b>Distance from Health facility</b>   |                          |                                      |                      |
| >20km                                  | 39(13.93)                | 37(10.00)                            | 1                    |
| 16-20km                                | 29(10.36)                | 26(7.03)                             | 0.97(0.68-1.40)      |
| 11-15km                                | 42(15.00)                | 40(10.81)                            | 1.00(0.73-1.38)      |

|                           |            |            |                 |                    |
|---------------------------|------------|------------|-----------------|--------------------|
| 5-10 km                   | 81(28.93)  | 86(23.24)  | 1.06(0.80-1.39) | 0.99(0.75-1.32)    |
| <5km                      | 89(31.79)  | 181(48.92) | 1.34(1.08-1.76) | 1.34(1.04-1.72) *  |
| <b>Cohabiting status</b>  |            |            |                 |                    |
| Living with a partner     | 212(75.71) | 334(90.27) | 1               | 1                  |
| Not living with a partner | 68(24.29)  | 36(9.73)   | 0.57(0.43-0.74) | 0.59(0.44-0.79) ** |

---

316 *p-value <0.05 were significant, NB \* = p<0.05, \*\* = p<0.01, \*\*\* = p<0.001*

## 317 **Discussion:**

318 The uptake of post abortion IUDs following medical management of first trimester incomplete  
 319 abortion at five public facilities in central Uganda, was 57%. The factors associated with post  
 320 abortion IUDs were; religion, woman's income, cohabiting status and participants' distance  
 321 from their homes to the health facilities.

322

323 The uptake of post abortion IUDs in our study is similar to the 60% reported in the Marie  
 324 Stopes International clinics across Australia[41] but it is significantly higher than the one  
 325 percent reported at two public hospitals in Kisumu, Kenya. In this Kenyan study, a high  
 326 proportion of women opted for injectable Depo-Provera (39%) followed by pills (27%) and  
 327 condoms (25%) [5]. Our study's post abortion IUD uptake is also comparable to the 48%  
 328 reported in Kalafong Provincial Tertiary Hospital in Atteridgeville, Pretoria, South Africa  
 329 following uterine evacuation[42]. Although, uptake of post abortion intrauterine contraception  
 330 has been reported to be higher after surgical as compared to medical evacuation [41, 43], the  
 331 uptake in our study after medical evacuation was higher than the 18.4% reported in the  
 332 Massachusetts, United States after surgical evacuation[44]. Comparisons of our high uptake  
 333 rate and rates shown in previous studies must however, be done with some caution, keeping in  
 334 mind that we included only women who had expressed an interest in initiating an IUD and who  
 335 attended a follow-up visit in facilities with healthcare providers who had recently received  
 336 comprehensive training in post abortion family planning counselling and provision. The  
 337 importance and positive impact of healthcare providers' training on the uptake of post abortion  
 338 IUDs has previously been shown by Benson et al. who analyzed client log book data from  
 339 921,918 abortion care cases in 4,881 health facilities from July 2011 through June 2015 across  
 340 ten countries in Asia and sub-Saharan Africa[39]. Trained healthcare providers were more  
 341 likely to adequately counsel and offer post abortion contraception compared to healthcare  
 342 providers who were not trained. Hence, acquisition of the appropriate knowledge and skillsets  
 343 in post abortion intrauterine contraception by healthcare providers in our study could explain

344 the high uptake of the IUDs. Other studies in similar settings have reported that the uptake of  
345 contraception was even higher when the available healthcare providers were more skilled in  
346 intrauterine contraception, and in the facilities that had procedure rooms for evacuation[45-47].

347

348 About 42.4 % of study participants who took up post abortion IUDs chose the hormonal IUDs.  
349 Although Levonorgestrel IUDs have been reported to have advantages [48, 49] such as reduced  
350 menstrual loss, and dysmenorrhea, compared to the copper IUDs, nearly 60% of the  
351 participants in the study preferred copper IUDs over Levonorgestrel IUDs. Despite the said  
352 advantages, a number of African women desire to have periods as an assurance of their fertility  
353 that might not be the case with Levonorgestrel IUDs[50].

354

355 Findings in our study show that religion has an impact on the uptake of post abortion IUDs.  
356 The influence of religion on contraceptive use has been highlighted in other studies. For  
357 instance, Addai, [51] identified religion as a strong determinant to the uptake of contraception  
358 in Ghana. In the United States, Catholics were reported to have low contraceptive user  
359 rates[52]. These results are contrasted by Bakibinga 2016, who found that religion didn't have  
360 any influence on the uptake of contraception [53]. The observation of more Pentecostal  
361 Christians and Catholics taking on post abortion IUDs as reported in our study could suggest a  
362 mindset adjustment among the individuals and a collective effort from the religious leaders to  
363 advocate for effective contraception like IUDs. In Western Kenya, when religious leaders were  
364 offered with the appropriate family planning knowledge and involvement at six faith-based  
365 organizations, the uptake of modern contraception increased by tenfold. This underscores the  
366 impact of religious leaders' involvement and advocacy in the uptake modern contraception  
367 [54].

368

369 Our study results underscore the importance of how socio-economic status on contraceptive  
370 uptake. Although contraceptives were free of charge in our study, we found that women who  
371 earned more than one million Ugandan shillings (USD 270) were more likely to opt for IUDs  
372 as compared to house wives or those who were unemployed. Wealthier women have been  
373 reported to utilize the IUDs more than unemployed women [10]. The wealth status is believed  
374 to follow women's education status that gives the women more power to decide their  
375 contraceptive choices. As women get more years of education, their wealth status improves.  
376 This empowerment enables wealthier women to make more informed decision in regard to  
377 their contraceptive needs as compared to women of less education and low social economic



378 status[55]. Women of low socioeconomic status in Marie Stopes International clinics across  
379 Australia were noted to leave without their intrauterine contraception of preference [41] as  
380 compared to those in the higher economic quintiles thereby being predisposed to subsequent  
381 unintended pregnancies. These findings highlight opportunities to counteract reproductive  
382 health inequities. Policy makers in Uganda should consider subsidizing contraceptives to  
383 ensure access to IUDs for women in lower economic quintiles as well as strengthening efforts  
384 towards female education for informed contraceptive decision making.

385

386 In our study, women who were co-habiting with their partners were more likely to use post  
387 abortion intrauterine contraception than single women. This finding has been reported in other  
388 studies[5, 56, 57]. The higher uptake of post abortion IUDs among women in union could be  
389 resulting from influence by their partners [58]. The emotional and physical support from their  
390 partners during the management of the abortions could have influenced the higher uptake of  
391 post abortion IUDs among the marrieds in our study as reported by Kayi et.al in Ghana[56].  
392 The uptake could also result from healthcare provider bias with providers being less likely to  
393 push LARCs on young single women in sub-Saharan Africa [59, 60]. Young and unmarried  
394 women are commonly encouraged to abstain for fears of becoming infertile following IUD use  
395 [61-63]. In Uganda, 44.5% of the pregnancies are unintended[64]. It's likely that married  
396 women have an immediate danger of becoming pregnant shortly after an abortion, hence the  
397 increased urgency to adopt a family planning method.

398

399 Our study findings suggest that proximity to health facilities influences the uptake of post  
400 abortion intrauterine contraception. The fact that after medical management women were  
401 expected to return for insertion could be the explanation that women who lived closer to the  
402 health facilities were more likely to have their IUDs inserted than those who stayed far. Time  
403 that would have been wasted in transit as women travel long distances to seek family planning  
404 consultations, is reduced by women staying closer to the health facilities. In similar settings as  
405 noted by Achana in Upper East Region of Ghana, women staying within two kilometres were  
406 36% more likely to use contraception than those who lived further[65]. Staying within five  
407 kilometres to the health facilities among the rural married women was associated with  
408 increased utilization of modern contraceptive methods in Rural Ethiopia [66]. Policy makers  
409 ought to facilitate services that ensure that quick start of family planning methods can integrate  
410 in contraceptive counselling and provision on the first contact after abortion treatment. Such

411 approaches can ensure that women who live far don't have to return for follow up visits. Follow  
412 up visits for women staying far could be prioritized to be over phone for a majority of women.  
413 Prior studies have shown higher continuation rates and patient satisfaction with early  
414 intrauterine contraception within a week of medical management of abortions than with the  
415 standard insertion between 2-4 weeks later[26]. There's also no need for back up contraception  
416 with early insertion as implemented for standard care of inserting IUDs 2-4 weeks later[67,  
417 68].

418

419 The strength of this study lies in the fact that our sample size of 650 participants was large and  
420 included both rural and urban women giving us the ability to generalize our study findings.  
421 Participants were comprehensively counseled on a wide range of contraceptive methods and  
422 voluntarily adopted a method of their choice thereby minimizing social desirability bias. The  
423 healthcare providers had extensive trainings in post abortion family planning counselling and  
424 provision prior to the study. The acquired knowledge and skillsets in post abortion  
425 contraception was a backbone that could have motivated women to fully participate from start  
426 to end of the study.

427

428 We were however unable to determine the continuation rates among the study participants as  
429 the study design was cross-sectional. Healthcare providers' and couples' perceived barriers and  
430 motivators as factors for the uptake of post abortion contraception, couldn't be determined in  
431 the current study but should be explored further. Only public facilities offering free family  
432 planning services were used in the current study. In our study, only women who expressed  
433 interest in initiating intrauterine contraceptive method, and attended the post abortion follow  
434 up visit, were included in the study. Our results may not be comparable to other similar studies  
435 that look at post abortion uptake in general after medical management of first trimester  
436 incomplete abortions.

## 437 **Conclusion:**

438 The uptake of IUDs among post abortion women was nearly 60% emphasizing the need to  
439 integrate IUD services in the post abortion care package. Our study findings accentuate the  
440 impact of comprehensive and updated training on post abortion contraceptive counselling on  
441 the uptake of IUDs. Efforts are now needed to ensure that all women seeking post abortion care  
442 in Uganda, regardless of sociodemographic status, are provided high-quality integrated  
443 services by trained providers, that offer a range of contraceptive methods, including IUDs.

444 Such efforts may not only prevent unintended pregnancies but also improve health equity  
445 across the country.

#### 446 **Abbreviations:**

|     |               |                                                      |
|-----|---------------|------------------------------------------------------|
| 447 | <b>DMPA</b>   | Injectable Depo-Medroxyprogesterone                  |
| 448 | <b>IUD</b>    | Intrauterine Device                                  |
| 449 | <b>LARCs</b>  | Long-Acting Reversible Contraceptives                |
| 450 | <b>PAC</b>    | Post Abortion Care                                   |
| 451 | <b>PAIC</b>   | Post Abortion Intrauterine contraception             |
| 452 | <b>SOMREC</b> | The School of Medicine Research and Ethics Committee |
| 453 | <b>UNCST</b>  | Uganda National Council for Science and Technology   |
| 454 | <b>WHO</b>    | World Health Organization                            |

#### 455 **Acknowledgements:**

456 We extend our sincere appreciation to the research team and study participants for making this  
457 study a reality. We are indebted to the study coordinators (Diane Achanda Genevieve and  
458 Diana Nankabirwa), and the Administrators of the health facilities for the support they gave us  
459 throughout the study. I'm so humbled by the support and guidance accorded to us by Prof Dan  
460 Kabonge Kaye, Dr John Mukisa, Ms. Proscovia Nakasujja, the Doctoral committee and my  
461 PhD supervisors at Makerere University Kampala Uganda, Karolinska Institutet, and WHO  
462 collaborating centre, Karolinska University Hospital, Stockholm, Sweden.

#### 463 **Financial Disclosure:**

464 This project was supported by funds from The Swedish Research Council, (Grant 2019-04256)  
465 in partnership with Makerere University and the MakRif Project. The content is solely the  
466 responsibility of the authors and does not necessarily represent the official views of The  
467 Swedish Research Council, Makerere University or the MakRif Project. The funder provided  
468 support in the form of research expenses, but did not have any additional role in the study  
469 design, data collection and analysis, decision to publish, or preparation of the manuscript.  
470 Neither The Swedish Research Council nor Makerere University, the funding organizations, is  
471 a commercial institution. Both of these institutions are research and education oriented and not  
472 commercial organizations.

## 473 **Competing interests:**

474 There were no competing interests for all authors. No organization played any role in the study  
475 design, data collection and analysis, decision to publish, or preparation of the manuscript and  
476 only provided financial support in the form of research expenses. The financial support from  
477 The Swedish Research Council in partnership with Makerere University did not alter our  
478 adherence to PLOS ONE policies on sharing data and materials.

## 479 **Availability of data and Materials:**

480 All the necessary data and materials underlying the findings described have been provided as  
481 part of this manuscript. In case any more data or materials are needed, they are readily  
482 accessible from the Secretary in the Department of Obstetrics and Gynecology library,  
483 Makerere University, College of Health Sciences, Kampala, Uganda.

## 484 **Author Contributions:**

485 Conceptualization: HK, EL, AC, KG  
486 Formal analysis: HK, JB, KO  
487 Data collection: DAG, DN,  
488 Funding acquisition: HK, EL  
489 Methodology: HK, EM, KS, AC, JR, MS  
490 Project administration: DAG, HK, DN  
491 Resources: KG, HK, NT, DAG  
492 Supervision: KO, AC, JB, NT, KG, JR, MS  
493 Writing original draft: HK,  
494 Writing review & editing: AC, KO, DK, EL, JR, MS

## 495 **References:**

- 496 1. Sedgh G, Singh S, Shah IH, Ahman E, Henshaw SK, Bankole A., *Induced abortion:*  
497 *incidence and trends worldwide from 1995 to 2008.* Obstetric Anesthesia Digest, 2013.  
498 **33**(1): p. 15-16.h
- 499 2. Conde-Agudelo A, Belizan JM, Breman R, Brockman SC, Rosas-Bermudez A.  
500 et al., *Effect of the interpregnancy interval after an abortion on maternal and perinatal*  
501 *health in Latin America.* International Journal of Gynecology & Obstetrics, 2005. **89**:  
502 p. S34-S40.

- 503 3. Ziraba AK, Izugbara C, Levandowski BA, Gebreselassie H, Mutua M, Mohamed SF,  
504 et al., *Unsafe abortion in Kenya: a cross-sectional study of abortion complication*  
505 *severity and associated factors*. BMC pregnancy and childbirth, 2015. **15**: p. 1-11.
- 506 4. Pike, G.K., *Abortion and Infertility*. Issues L. & Med., 2020. **35**: p. 173.
- 507 5. Makenzius M, Faxelid E, Gemzell-Danielsson K, Odero TM, Klingberg-Allvin M,  
508 Oguttu M., *Contraceptive uptake in post abortion care—Secondary outcomes from a*  
509 *randomised controlled trial, Kisumu, Kenya*. PloS one, 2018. **13**(8): p. e0201214.
- 510 6. Say L, Chou D, Gemmill A, Tunçalp Ö, Moller AB, Daniels J, et al., *Global causes of*  
511 *maternal death: a WHO systematic analysis*. The Lancet global health, 2014. **2**(6): p.  
512 e323-e333.
- 513 7. Ahmed S, Li Q, Liu L, Tsui AO., *Maternal deaths averted by contraceptive use: an*  
514 *analysis of 172 countries*. The Lancet, 2012. **380**(9837): p. 111-125.
- 515 8. Singh, S., J.E. Darroch, and L.S. Ashford., *Adding it up: the costs and benefits of*  
516 *investing in sexual and reproductive health 2014*. 2014.
- 517 9. Uganda Bureau of Statistics (UBOS) and ICF, International Inc, 2022., *Uganda*  
518 *Demographic And Health Survey (UDHS) 2022*. Kampala, Uganda and Rockville,  
519 Maryland, USA: UBOS and ICF
- 520 10. Belay, A.S., H. Sarma, and G. Yilak, *Spatial distribution and determinants of unmet*  
521 *need for family planning among all reproductive-age women in Uganda: a multi-level*  
522 *logistic regression modeling approach and spatial analysis*. Contraception and  
523 Reproductive Medicine, 2024. **9**(1): p. 4.
- 524 11. Alie, M.S., G.F. Abebe, and Y., Negesse, *Magnitude and determinants of unmet need*  
525 *for family planning among reproductive age women in East Africa: multilevel analysis*  
526 *of recent demographic and health survey data*. Contraception and Reproductive  
527 Medicine, 2022. **7**(1): p. 2.
- 528 12. Hussain, R., *Unintended pregnancy and abortion in Uganda*. 2013.
- 529 13. Carney, H., *Category: Health & Wellness*.
- 530 14. Sedgh G, Filippi V, Owolabi OO, Singh SD, Askew I, Bankole A, et al., *Insights from*  
531 *an expert group meeting on the definition and measurement of unsafe abortion*.  
532 International Journal of Gynecology & Obstetrics, 2016. **134**(1): p. 104-106.
- 533 15. Government of Uganda, Ministry of Health., *The National Annual Maternal and*  
534 *Perinatal Death Surveillance and Response (MPDSR) Report for FY 2022/2023*.  
535 September 2023.

- 536 16. Singh S, Prada E, Mirembe F, Kiggundu C., *The incidence of induced abortion in*  
537 *Uganda*. International family planning perspectives, 2005: p. 183-191.
- 538 17. Weeks A, Alia G, Blum J, Winikoff B, Ekwaru P, Durocher J, et al., *A randomized trial*  
539 *of misoprostol compared with manual vacuum aspiration for incomplete abortion*.  
540 *Obstetrics & Gynecology*, 2005. **106**(3): p. 540-547.
- 541 18. Klingberg-Allvin M, Cleeve A, Atuhairwe S, Tumwesigye NM, Faxelid E,  
542 Byamugisha J, et al., *Comparison of treatment of incomplete abortion with misoprostol*  
543 *by physicians and midwives at district level in Uganda: a randomised controlled*  
544 *equivalence trial*. The Lancet, 2015. **385**(9985): p. 2392-2398.
- 545 19. Roe, A.H. and D. Bartz., *Society of Family Planning clinical recommendations:*  
546 *contraception after surgical abortion*. Contraception, 2019. **99**(1): p. 2-9.
- 547 20. Gillett PG, Lee NH, Yuzpe AA, Cerskus I., *A comparison of the efficacy and*  
548 *acceptability of the Copper-7 intrauterine device following immediate or delayed*  
549 *insertion after first-trimester therapeutic abortion*. Fertility and sterility, 1980. **34**(2):  
550 p. 121-124.
- 551 21. Stanek AM, Bednarek PH, Nichols MD, Jensen JT, Edelman AB., *Barriers associated*  
552 *with the failure to return for intrauterine device insertion following first-trimester*  
553 *abortion*. Contraception, 2009. **79**(3): p. 216-220.
- 554 22. Davis A, Ramos ME, Rosario L, Westhoff C., *Timing of copper intrauterine device*  
555 *insertion after medical abortion: a randomized controlled trial*. *Obstetrics &*  
556 *Gynecology*, 2011. **118**(3): p. 623-628.
- 557 23. Paul M, Iyengar SD, Essén B, Gemzell-Danielsson K, Iyengar K, Bring J, et al., *Does*  
558 *mode of follow-up influence contraceptive use after medical abortion in a low-resource*  
559 *setting? Secondary outcome analysis of a non-inferiority randomized controlled trial*.  
560 *BMC public health*, 2016. **16**(1): p. 1-13.
- 561 24. Chong E, Frye LJ, Castle J, Dean G, Kuehl L, Winikoff B., *A prospective, non-*  
562 *randomized study of home use of mifepristone for medical abortion in the US*.  
563 *Contraception*, 2015. **92**(3): p. 215-219.
- 564 25. Grossman D, Ellertson C, Grimes DA, Walker D., *Routine follow-up visits after first-*  
565 *trimester induced abortion*. *Obstetrics & Gynecology*, 2004. **103**(4): p. 738-745.
- 566 26. Sääv, I., O. Stephansson, and K. Gemzell-Danielsson., *Early versus delayed insertion*  
567 *of intrauterine contraception after medical abortion—a randomized controlled trial*.  
568 *PloS one*, 2012. **7**(11): p. e48948.

- 569 27. Cameron, I. and D. Baird., *The return to ovulation following early abortion: a*  
570 *comparison between vacuum aspiration and prostaglandin*. European Journal of  
571 Endocrinology, 1988. **118**(2): p. 161-167.
- 572 28. Kakaire O, Nakiggude J, Lule JC, Byamugisha JK., *Post abortion women's perceptions*  
573 *of utilizing long acting reversible contraceptive methods in Uganda. A qualitative*  
574 *study*. Open journal of obstetrics and gynecology, 2014. **4**(16): p. 1087-1097.
- 575 29. Tsui, A.O., W. Brown, and Q. Li., *Contraceptive practice in sub-Saharan Africa*.  
576 *Population and development review*, 2017. **43**(Suppl Suppl 1): p. 166.
- 577 30. Alkema L, Kantorova V, Menozzi C, Biddlecom A., *National, regional, and global*  
578 *rates and trends in contraceptive prevalence and unmet need for family planning*  
579 *between 1990 and 2015: a systematic and comprehensive analysis*. The Lancet, 2013.  
580 **381**(9878): p. 1642-1652.
- 581 31. Nzokirishaka, A. and I. Itua., *Determinants of unmet need for family planning among*  
582 *married women of reproductive age in Burundi: a cross-sectional study*. Contraception  
583 and reproductive medicine, 2018. **3**: p. 1-13.
- 584 32. Khalil, S.N., M.M. Alzahrani, and A.F. Siddiqui., *Unmet need and demand for family*  
585 *planning among married women of Abha, Aseer Region in Saudi Arabia*. Middle East  
586 Fertility Society Journal, 2018. **23**(1): p. 31-36.
- 587 33. Blackstone, S.R., U. Nwaozuru, and J. Iwelunmor., *Factors influencing contraceptive*  
588 *use in sub-Saharan Africa: a systematic review*. International quarterly of community  
589 health education, 2017. **37**(2): p. 79-91.
- 590 34. Letamo, G. and K. Navaneetham., *Levels, trends and reasons for unmet need for family*  
591 *planning among married women in Botswana: a cross-sectional study*. BMJ open,  
592 2015. **5**(3): p. e006603.
- 593 35. Yibrah, H. and T. Gabriel., *Explaining unmet need for family planning in rural Tigray,*  
594 *Ethiopia*. J Contracept Stud, 2018. **3**(2): p. 14.
- 595 36. Kumar, A. and A. Singh., *Trends and determinants of unmet need for family planning*  
596 *in Bihar (India): evidence from National Family Health Surveys*. Advances in Applied  
597 Sociology, 2013. **3**(2): p. 157-163.
- 598 37. Blumenthal, P.D., A. Voedisch, and K. Gemzell-Danielsson., *Strategies to prevent*  
599 *unintended pregnancy: increasing use of long-acting reversible contraception*. Human  
600 reproduction update, 2011. **17**(1): p. 121-137.

- 601 38. Prada E, Atuyambe LM, Blades NM, Bukenya JN, Orach CG, Bankole A., *Incidence*  
602 *of Induced Abortion in Uganda, 2013: New Estimates Since 2003*. PLoS ONE, 2016.  
603 **11**(11): p. e0165812.
- 604 39. Benson J, Andersen K, Healy J, Brahmi D., *What factors contribute to postabortion*  
605 *contraceptive uptake by young women? A program evaluation in 10 countries in Asia*  
606 *and sub-Saharan Africa*. Global Health: Science and Practice, 2017. **5**(4): p. 644-657.
- 607 40. *World Medical Association Declaration of Helsinki: ethical principles for medical*  
608 *research involving human subjects.*, The Journal of the American College of Dentists,  
609 2014. **81**(3): p. 14.
- 610 41. Goldstone P, Mehta YH, McGeechan K, Francis K, Black KI., *Factors predicting*  
611 *uptake of long-acting reversible methods of contraception among women presenting*  
612 *for abortion*. Medical Journal of Australia, 2014. **201**(7): p. 412-416.
- 613 42. Moagi, M., L.C. Snyman, and J.D. Makin., *Feasibility and uptake of intrauterine*  
614 *contraceptive device at the time of uterine evacuation in women presenting with*  
615 *incomplete miscarriage at Kalafong Provincial Tertiary Hospital*. in *Obstetrics and*  
616 *Gynaecology Forum*. 2019. In House Publications.
- 617 43. Rocca CH, Goodman S, Grossman D, Cadwallader K, Thompson KM, Talmont E, et  
618 al., *Contraception after medication abortion in the United States: results from a cluster*  
619 *randomized trial*. American journal of obstetrics and gynecology, 2018. **218**(1): p. 107.  
620 e1-107. e8.
- 621 44. Roe AH, Fortin J, Janiak E, Maurer R, Goldberg AB., *Prevalence and predictors of*  
622 *initiation of intrauterine devices and subdermal implants immediately after surgical*  
623 *abortion*. Contraception, 2019. **100**(2): p. 89-95.
- 624 45. Mutua MM, Achia TN, Manderson L, Musenge E., *Spatial and socio-economic*  
625 *correlates of effective contraception among women seeking post-abortion care in*  
626 *healthcare facilities in Kenya*. PloS one, 2019. **14**(3): p. e0214049.
- 627 46. Solo, J., *Creating linkages between incomplete abortion treatment and family planning*  
628 *services in Kenya*. Studies in family planning, 1999. **30**(1): p. 17-27.
- 629 47. Sundaram A, Juarez F, Ahiadeke C, Bankole A, Blades N., *The impact of Ghana's R3M*  
630 *programme on the provision of safe abortions and postabortion care*. Health Policy and  
631 Planning, 2015. **30**(8): p. 1017-1031.
- 632 48. Kadir, R.A. and C. Chi., *Levonorgestrel intrauterine system: bleeding disorders and*  
633 *anticoagulant therapy*. Contraception, 2007. **75**(6): p. S123-S129.



- 634 49. Pakarinen, P. and T. Luukkainen., *Treatment of menorrhagia with an LNG-IUS.*  
635 Contraception, 2007. **75**(6): p. S118-S122.
- 636 50. Laher F, Todd CS, Stibich MA, Phofa R, Behane X, Mohapi L., *Role of menstruation*  
637 *in contraceptive choice among HIV-infected women in Soweto, South Africa.*  
638 Contraception, 2010. **81**(6): p. 547-551.
- 639 51. Addai, I., *Does religion matter in contraceptive use among Ghanaian women?* Review  
640 of Religious Research, 1999: p. 259-277.
- 641 52. Fehring, R. and J. Ohlendorf., *The influence of religiosity on contraceptive use and*  
642 *abortion in the United States.* Life and Learning XVII, 2007.
- 643 53. Bakibinga P, Mutombo N, Mukiira C, Kamande E, Ezeh A, Muga R., *The influence of*  
644 *religion and ethnicity on family planning approval: a case for women in rural Western*  
645 *Kenya.* Journal of religion and health, 2016. **55**: p. 192-205.
- 646 54. Ruark A, Kishoyian J, Bormet M, Huber D. ., *Increasing family planning access in*  
647 *Kenya through engagement of faith-based health facilities, religious leaders, and*  
648 *community health volunteers.* Global Health: Science and Practice, 2019. **7**(3): p. 478-  
649 490.
- 650 55. Tetui M, Baroudi M, Ssekamatte T, Birabwa C, Kibira SP, Atuyambe L., *Total demand,*  
651 *use and unmet need for modern contraceptives among women living in informal*  
652 *settlements in Kira Municipality, Wakiso District, Uganda. Implications for urban*  
653 *health.* Frontiers in Global Women's Health, 2021. **2**: p. 655413.
- 654 56. Kayi EA, Biney AA, Dodoo ND, Ofori CA, Dodoo FN., *Women's post-abortion*  
655 *contraceptive use: Are predictors the same for immediate and future uptake of*  
656 *contraception? Evidence from Ghana.* Plos one, 2021. **16**(12): p. e0261005.
- 657 57. Delvaux T, Sœur S, Rathavy T, Crabbé F, Buvé A., *Integration of comprehensive*  
658 *abortion-care services in a Maternal and Child Health clinic in Cambodia.* Tropical  
659 Medicine & International Health, 2008. **13**(8): p. 962-969.
- 660 58. Abdel-Tawab N, Huntington D, Hassan EO, Youssef H, Nawar L., *Effects of husband*  
661 *involvement on postabortion patients' recovery and use of contraception in Egypt.*  
662 Postabortion Care: Lessons from Operations Research. Nueva York: Population  
663 Council, 1999: p. 16-37.
- 664 59. Nalwadda G, Mirembe F, Byamugisha J, Tumwesigye NM, Faxelid E., *Young peoples'*  
665 *interface with providers of contraceptive care: a simulated client study in two Ugandan*  
666 *districts.* Contraception and Reproductive Medicine, 2016. **1**: p. 1-10.

- 667 60. Cooke, A., *A Systematic Review of Physician-Patient Interactions and the Effect of*  
668 *Health Care Provider Bias and Knowledge on Adolescent Contraception Counseling*  
669 *in Developing Countries and Comprehensive Review: Contraceptive Use and Impact*  
670 *of Physician Counseling for Adolescent Patients of Method Choices and Side Effects in*  
671 *Developing Countries*. 2019.
- 672 61. Sedlander E, Bingenheimer JB, Thiongo M, Gichangi P, Rimal RN, Edberg M, et al.,  
673 “They destroy the reproductive system”: exploring the belief that modern contraceptive  
674 use causes infertility. *Studies in family planning*, 2018. **49**(4): p. 345-365.
- 675 62. Gomez, A.M. and B. Freihart., *Motivations for interest, disinterest and uncertainty in*  
676 *intrauterine device use among young women*. *Maternal and Child Health Journal*, 2017.  
677 **21**: p. 1753-1762.
- 678 63. Osei IF, Mayhew SH, Biekro L, Collumbien M, ECAF Team., *Fertility decisions and*  
679 *contraceptive use at different stages of relationships: windows of risk among men and*  
680 *women in Accra*. *International perspectives on sexual and reproductive health*, 2014.  
681 **40**(3): p. 135-143.
- 682 64. Asrat, D., A. Copas, and A. Olubukola., *Exploring the association between unintended*  
683 *pregnancies and unmet contraceptive needs among Ugandan women of reproductive*  
684 *age: an analysis of the 2016 Uganda demographic and health survey*. *BMC Pregnancy*  
685 *and Childbirth*, 2024. **24**(1): p. 117.
- 686 65. Achana FS, Bawah AA, Jackson EF, Welaga P, Awine T, Asuo-Mante E, et al., *Spatial*  
687 *and socio-demographic determinants of contraceptive use in the Upper East region of*  
688 *Ghana*. *Reproductive health*, 2015. **12**: p. 1-10.
- 689 66. Shiferaw S, Spigt M, Seme A, Amogne A, Skrøvseth S, Desta S, et al., *Does proximity*  
690 *of women to facilities with better choice of contraceptives affect their contraceptive*  
691 *utilization in rural Ethiopia?* *PloS one*, 2017. **12**(11): p. e0187311.
- 692 67. Royal College of Obstetricians and Gynaecologists., *The care of women requesting*  
693 *induced abortion*. 2011: RCOG press.
- 694 68. Okusanya, B.O., O. Oduwole, and E.E. Effa., *Immediate postabortal insertion of*  
695 *intrauterine devices*. *Cochrane Database of Systematic Reviews*, 2014(7).  
696

697 **Supporting Information:**

698 We have availed the approved study protocol, ethical approval forms from the School of  
699 Medicine, Makerere University Ethic Review, and the Uganda National Committee of Science  
700 and Technology, informed consent and the data collection tool. The authors agree to the data  
701 sharing plan. In case any more data or materials are needed, they are readily accessible in the  
702 Department of Obstetrics and Gynecology library, Makerere University College of Health  
703 Sciences, Kampala, Uganda.
